# Supplementary material for: The Risk of Venous Thromboembolism and Ischemic Stroke Stratified by VTE Risk Following Multiple Myeloma: A Korean Population-Based Cohort Study
Source: MDPI journal article supplement (doi:10.3390/jcm13102829), 2024-05-11
Supplement: s1 [file s1]

## Supplementary

**Table S1. Definitions and codes for variables of the IMPEDE VTE scores [1-6].**

| Variables                                             | Scores | Definition†                                            | Codes                                                                                                                                                                                |
|-------------------------------------------------------|--------|--------------------------------------------------------|--------------------------------------------------------------------------------------------------------------------------------------------------------------------------------------|
| Immunomodulatory drug                                 | +4     | ATC codes (-30, 30)                                    | Thalidomide: L04AX02;<br>Lenalidomide: L04AX04;<br>Pomalidomide: L04AX06.                                                                                                            |
| Body mass index $\geq 25$ kg/m <sup>2</sup>           | +1     | ICD-10 codes (-365, -1)                                | Obesity: E66                                                                                                                                                                         |
| Pathologic fracture<br>pelvis/hip/femur               | +4     | ICD-10 codes (-30, -1)                                 | Pelvis: S320, S321, S328;<br>Hip/femur: S720, S721, S724.                                                                                                                            |
| Erythropoiesis-stimulating<br>agent                   | +1     | ATC codes (-30, 30)                                    | Methoxy polyethylene glycol-<br>epoetin $\beta$ : B03XA03;<br>Darbepoetin $\alpha$ : B03XA02.                                                                                        |
| Dexamethasone<br>(high dose:<br>$\geq 160$ mg/4weeks) | +4     | ATC codes (-30, 30)                                    | D07XB05, H02AB06                                                                                                                                                                     |
| Dexamethasone<br>(low dose:<br>$< 160$ mg/4weeks)     | +2     | ATC codes (-30, 30)                                    | D07XB05, H02AB06                                                                                                                                                                     |
| Doxorubicin                                           | +3     | ATC codes (-30, 30)                                    | L01DB01                                                                                                                                                                              |
| Ethnicity/race: Asian race                            | -3     | All patients                                           | NA                                                                                                                                                                                   |
| VTE history                                           | +5     | ICD-10 codes (-365, -183)                              | I26, I80, I81, I82, O082, O223,<br>O871, O882                                                                                                                                        |
| Tunneled line/CVC                                     | +2     | Procedure codes (-365, -1)                             | O1654,O1655,O1656                                                                                                                                                                    |
| Existing therapeutic warfarin<br>or LMWH use          | -5     | ATC codes with ICD-10<br>codes for AF or VTE (-30, 30) | Warfarin: B01AA03;<br>Enoxaparin: B01AB05;<br>Nadroparin: B01AB06;<br>Dalteparin: B01AB04;<br>Bemiparin: B01AB12;<br>AF: I48;<br>VTE: I26, I80, I81, I82, O082,<br>O223, O871, O882. |
| Existing prophylactic aspirin<br>or LMWH use          | -3     | ATC codes without ICD-10<br>for VTE (-30, 30)          | Aspirin: A01AD05, B01AC06,<br>N02BA01;<br>VTE: I26, I80, I81, I82, O082,<br>O223, O871, O882.                                                                                        |

Abbreviations: AF, atrial fibrillation; ATC, Anatomical Therapeutic Chemical; ICD-10, International Classification of Diseases 10<sup>th</sup>; VTE, venous thromboembolism.

† The index date (Day 0) was defined as the first calendar date of chemotherapy.

## Reference

1. Chalayer, E., et al., *Prediction of venous thromboembolism in patients with multiple myeloma treated with lenalidomide, bortezomib, dexamethasone, and transplantation: Lessons from the substudy of IFM/DFCI 2009 cohort*. Journal of Thrombosis and Haemostasis, 2022. **20**(8): p. 1859-1867.
2. Covut, F., et al., *Validation of the IMPEDE VTE score for prediction of venous thromboembolism in multiple myeloma: a retrospective cohort study*. British Journal of Haematology, 2021. **193**(6): p. 1213-1219.
3. Jang, D.S., et al., *Stratification of Venous Thromboembolism Risk in Multiple Myeloma and Analysis of the Use of Antithrombotic Agents*. Journal of Korean Society of Health-System Pharmacists, 2023. **40**(2): p. 158-170.
4. Li, A., et al., *Derivation and Validation of a Risk Assessment Model for Immunomodulatory Drug-Associated Thrombosis Among Patients With Multiple Myeloma*. J Natl Compr Canc Netw, 2019. **17**(7): p. 840-847.
5. Li, X., et al., *Development and validation of a new risk assessment model for immunomodulatory drug-associated venous thrombosis among Chinese patients with multiple myeloma*. Thromb J, 2023. **21**(1): p. 105.
6. Sanfilippo, K.M., et al., *Predicting venous thromboembolism in multiple myeloma: development and validation of the IMPEDE VTE score*. American journal of hematology, 2019. **94**(11): p. 1176-1184.
